# Supplementary material for: Synthesis of Bentonite/Mil-68(Al) Composite for Hg 2+ Adsorption and Electrochemical Detection
Source: Research Square preprint supplement (doi:10.21203/rs.3.rs-6951270/v1), 2025-07-02
Supplement: Supplementary file 1 [file 66c1f024cdb3a21775b21da5.docx]

**SYNTHESIS OF B/MIL-68(AL) COMPOSITE FOR Hg2+ ADSORPTION AND ELECTROCHEMICAL DETECTION**

**Paula Andrea Murcia Diaz1, Jaime Fernando Martínez Suarez1, Lisette Ruiz Bravo1, Jimena Tuninetti2, Matias Rafti2***

1 Programa de Química, Facultad de Ciencias Básicas, Universidad de la Amazonía, Calle 17 – diagonal 17 carrera 3F, Campus Porvenir, Florencia, Colombia

2 Departamento de Química, Instituto de Investigaciones Fisicoquímicas Teóricas y Aplicadas, Universidad Nacional de La Plata, La Plata, 1900, Argentina

Correspondence: [mrafti@quimica.unlp.edu.ar](mailto:mrafti@quimica.unlp.edu.ar)

Tabls S1. *Epa, Epc, Ipa, Ipc, ΔEp, E1/2* parameters and, the *Ipc/Ipa*  ratio for SPEAu/B/MIL-68(Al) in a 1 mM de K4[Fe(CN)6]/K3[Fe(CN)6] solution in KCl 0.1M.

| *v* (mV s-1) | *Ipa* (µA) | *Epa* (V) | *Ipc* (-µA) | *Epc* (V) | *E1/2* (V) | *ΔEp* (V) | *Ipa/Ipc* |
| --- | --- | --- | --- | --- | --- | --- | --- |
| 10 | 11.70 | 0.13 | 11.20 | 0.06 | 0.09 | 0.07 | 1.04 |
| 25 | 17.40 | 0.13 | 16.10 | 0.05 | 0.09 | 0.07 | 1.08 |
| 50 | 23.50 | 0.13 | 21.30 | 0.05 | 0.09 | 0.07 | 1.10 |
| 100 | 29.80 | 0.13 | 25.80 | 0.05 | 0.09 | 0.07 | 1.15 |
| 200 | 48.40 | 0.14 | 45.80 | 0.05 | 0.09 | 0.08 | 1.05 |
| 300 | 58.10 | 0.14 | 54.70 | 0.05 | 0.09 | 0.08 | 1.06 |
| 400 | 67.10 | 0.13 | 62.70 | 0.05 | 0.09 | 0.08 | 1.07 |
| 500 | 76.50 | 0.14 | 72.40 | 0.06 | 0.10 | 0.08 | 1.05 |

Table S2. Analytical performance of various electrochemical platforms.

| Platform | LOD  (μg L-1) | Linear Range (μg L-1) | Analytical Method | Electrolyte | Reference |
| --- | --- | --- | --- | --- | --- |
| Zr-DMBD MOFs/3D-KSC/GCE | 10.03 | 50.15 - 702,1 | SWAVS | 0.2 M acetate buffer, pH 6 | [1] |
| rGO/SMOF/PEI/SPCE | 107.70 | 103.6 - 2693,6 | DPV | Supporting electrolyte, pH 5 | [2] |
| [AC/UiO-66-NH2]2/GCE | 0.001 | 0.003 - 1000 | DPASV | Supporting electrolyte, pH 5 | [3] |
| PGE/MXene QDs-PEI/COF | 3.21 | 100.30 – 7020.65 | DPASV | 0.1 M HCl | [4] |
| UiO-66-NHC(S)NHMe/3D-KSC | 1.88 | 5.65 – 1604.72 | SWASV | 0.2 M Acetate Buffer, pH 5 | [5] |
| SPEAu/B/MIL-68(Al) | 10.14 | 50 - 1000 | DPASV | 0.1 M HCl | This work |

Tabla S3. Parameters for the non-linear Langmuir and Freundlich fit of the isotherms.

| Material | Langmuir | | Freundlich | | |
| --- | --- | --- | --- | --- | --- |
| Bentonite | Qmax (mg g-1) | No Fit | n | 0.5175 ± 0.0754 |
| KL (Lmg-1) | No Fit | KF (mg g-1)(L mg-1)1/n | 0.0619 ± 0.0149 |
| R2 | No Fit | R2 | 0.9381 |
| AIC | No Fit | AIC | -46.9208 |
| B/MIL(68)-Al | Qmax (mg g-1) | No Fit | n | 1.4521 ± 0.0274 |
| KL (Lmg-1) | No Fit | KF (mg g-1)(L mg-1)1/n | 0.0367 ± 0.0008 |
| R2 | No Fit | R2 | 0.9923 |
| AIC | No Fit | AIC | 118.2603 |

References

[1] H. Yang, C. Peng, J. Han, Y. Song, and L. Wang, “Three-dimensional macroporous Carbon/Zr-2,5-dimercaptoterephthalic acid metal-organic frameworks nanocomposites for removal and detection of Hg(II),” *Sens Actuators B Chem*, vol. 320, 2020, doi: 10.1016/j.snb.2020.128447.

[2] Z. Xu, Z. Liu, M. Xiao, L. Jiang, and C. Yi, “A smartphone-based quantitative point-of-care testing (POCT) system for simultaneous detection of multiple heavy metal ions,” *Chemical Engineering Journal*, vol. 394, 2020, doi: 10.1016/j.cej.2020.124966.

[3] J. Zou *et al.*, “Multilayer activated biochar/UiO-66-NH2 film as intelligent sensing platform for ultra-sensitive electrochemical detection of Pb2+ and Hg2+,” *Appl Surf Sci*, vol. 569, 2021, doi: 10.1016/j.apsusc.2021.151006.

[4] Z. Emami and R. Mohammad-Rezaei, “MXene quantum dots/polyethylenimine/covalent organic framework nanocomposite for selective determination of Hg2+ in water samples using differential pulse anodic stripping voltammetry,” *Journal of Materials Science: Materials in Electronics*, vol. 35, no. 33, p. 2113, Nov. 2024, doi: 10.1007/s10854-024-13838-0.

[5] L. Pei, H. Yang, S. Chen, and L. Wang, “UiO-66-NHC(S)NHMe/Three-Dimensional Macroporous Carbon for Removal and Electrochemical Detection of Cd2+, Pb2+, Cu2+, and Hg2+,” *Ind Eng Chem Res*, vol. 61, no. 4, 2022, doi: 10.1021/acs.iecr.1c04029.
